# Supplementary material for: Poly- N -acetylglucosamine and poly(glycerol phosphate) teichoic acid identification from staphylococcal biofilm extracts using excitation sculptured TOCSYNMR
Source: Royal Society of Chemistry journal article supplement (doi:10.1039/b715242f), 2007-11-23
Supplement: b715242f.pdf [file b715242f.pdf]

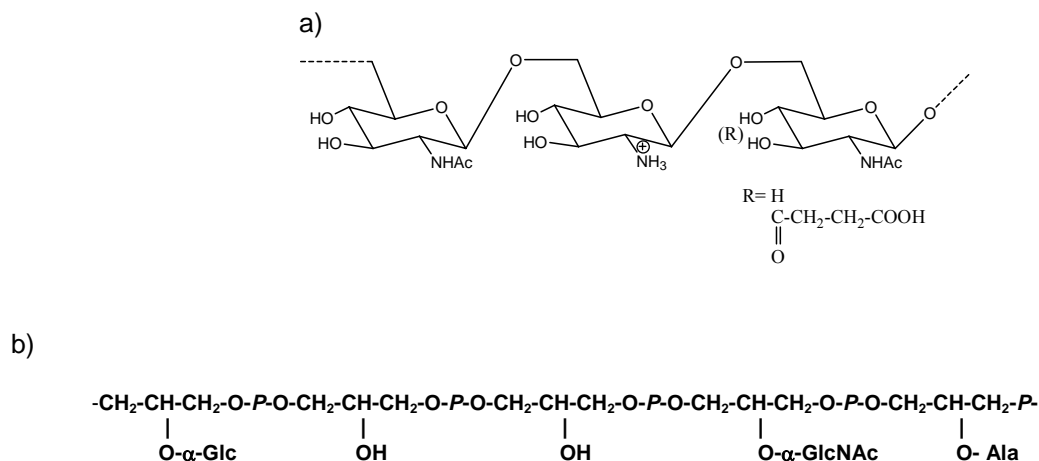

Figure S.1. The structures of (a) PNAG and (b) TA from *S. epidermidis* 5.

| TA constituent | Position        | <sup>1</sup> H Shift / ppm | <sup>13</sup> C Shift / ppm |
|----------------|-----------------|----------------------------|-----------------------------|
| α-Glc          | 1/1'            | 5.19                       | 99.1                        |
|                | 2               | 3.55                       | 72.8                        |
|                | 3/3'            | 3.78                       | 74.3                        |
|                | 4               | 3.42                       | 71.0                        |
|                | 5               | 3.92                       | 73.3                        |
|                | 6               | 3.78                       | 62.0                        |
|                | 6'              | 3.90                       |                             |
| α-GluNAc       | 1/1'            | 5.10                       | 98.2                        |
|                | 2               | 3.95                       | 55.0                        |
|                | 3/3'            | 3.82                       | 72.3                        |
|                | 4               | 3.49                       | 71.4                        |
|                | 5               | 3.95                       | 73.3                        |
|                | 6               | 3.78                       | 62.0                        |
|                | 6'              | 3.90                       |                             |
| Ala            | CH <sub>3</sub> | 2.10                       | 23.5                        |
|                | 1               |                            | 171.3                       |
|                | 2               | 4.30                       | 50.3                        |
| Gro - Ala      | 3               | 1.64                       | 16.7                        |
|                | 2               | 5.39                       | 75.5                        |
| Gro - Glc      | 1/1' & 3/3'     | 4.13                       | 65.0                        |
|                | 1/1'            | 4.04                       | 65.9*                       |
|                | 3/3'            | 4.04                       | 66.6*                       |
| Gro - GluNAc   | 2               | 4.13                       | 76.8                        |
|                | 1/1'            | 4.04                       | 65.9*                       |
|                | 3/3'            | 4.04                       | 66.6*                       |
| Gro - Free     | 2               | 4.07                       | 77.2                        |
|                | 1/1'            | 3.92                       | 67.6                        |
|                | 3/3'            | 3.98                       | 67.6                        |
|                | 2               | 4.06                       | 70.8                        |

**Table S.1. The <sup>1</sup>H and <sup>13</sup>C chemical shifts of each extracellular TA substituent from *S. epidermidis* 5.** Constituents beginning Gro denote that part of the glycerol phosphate backbone and the various substituents. \* indicates can be interchanged inside residue. <sup>1</sup>H and <sup>13</sup>C chemical shifts of EC TA from *S. epidermidis* 5, as assigned by 2D homonuclear and heteronuclear correlation techniques on a Varian UnityINOVA 500 MHz NMR Spectrometer.

| TA constituent     | Position             | <sup>1</sup> H Shift / ppm | <sup>13</sup> C Shift / ppm |
|--------------------|----------------------|----------------------------|-----------------------------|
| $\alpha$ -Glc      | 1                    | 5.178                      | 100.43                      |
|                    | 2                    | 3.542                      | 74.18                       |
|                    | 3                    | 3.764                      | 75.67                       |
|                    | 4                    | 3.410                      | 72.43                       |
|                    | 5                    | 3.933                      | 74.59                       |
|                    | 6                    | 3.764                      | 63.33                       |
|                    | 6'                   | 3.897                      | 63.33                       |
| $\alpha$ -GluNAc   | 1                    | 5.080                      | -                           |
|                    | 2                    | 3.939                      | 56.23                       |
|                    | 3                    | 3.807                      | 73.66                       |
|                    | 4                    | 3.483                      | 72.72                       |
|                    | 5                    | 3.939                      | 74.59                       |
|                    | 6                    | 3.764                      | 63.33                       |
|                    | 6'                   | 3.897                      | 63.33                       |
|                    | NAc: CH <sub>3</sub> | 2.054                      | 25.02                       |
| Ala                | 2                    | 4.27                       | 51.53                       |
|                    | 3                    | 1.609                      | 18.04                       |
| Gro - Ala          | 2                    | 5.383                      | 76.89                       |
|                    | 1&3                  | 4.091                      | 66.37                       |
| Gro - Glc          | 1                    | 4.044                      | 66.99                       |
|                    | 1'                   | 3.975                      | 66.99                       |
|                    | 3                    | 4.044                      | 68.00                       |
|                    | 3'                   | 3.975                      | 68.00                       |
|                    | 2                    | 4.119                      | 78.07                       |
| Gro - GluNAc       | 1                    | 4.044                      | 66.99                       |
|                    | 1'                   | 3.975                      | 66.99                       |
|                    | 3                    | 4.044                      | 68.00                       |
|                    | 3'                   | 3.975                      | 68.00                       |
|                    | 2                    | 4.060                      | 78.44                       |
| Gro - Free         | 1&3                  | 3.954                      | 68.96                       |
|                    | 1'&3'                | 3.888                      | 68.96                       |
|                    | 2                    | 4.036                      | 72.28                       |
| $\alpha$ Glc - ala | 1                    | 5.197                      | 100.09                      |
|                    | 2                    | 3.558                      | 73.98                       |
|                    | 3                    | 3.973                      | 73.78                       |
|                    | 4                    | 3.410                      | 72.43                       |
|                    | 5                    | 4.192                      | 71.09                       |
|                    | 6                    | 4.437                      | -                           |
|                    | 6'                   | 4.643                      | -                           |

**Table S.2. Repeated <sup>1</sup>H and <sup>13</sup>C chemical shifts of each extracellular TA substituent used in SXS TOCSY resonance assignments.** (-) denotes <sup>13</sup>C chemical shift cannot be elucidated as falls within the solvent suppression area of HSQC spectra. As above, constituents beginning Gro denote that part of the glycerol phosphate backbone and the various substituents. Tentative assignment of  $\alpha$ -Glucose O-6 alanine also listed in the table, however its presence in *S. epidermidis* 5 has not previously been observed (11/E. Vinogradov, unpublished observations)

| PNAG constituent            | Position        | $^1\text{H}$ Shift / ppm | $^{13}\text{C}$ Shift / ppm |
|-----------------------------|-----------------|--------------------------|-----------------------------|
| $\beta$ -GlcNAc             | 1               | 4.518                    | -                           |
|                             | 2               | 3.710                    | 58.13                       |
|                             | 3               | 3.550                    | 76.40                       |
|                             | 4               | 3.401                    | 72.72                       |
|                             | 5               | 3.550                    | 65.21                       |
|                             | 6               | 4.168                    | 71.21                       |
|                             | 6'              | 3.710                    | 71.21                       |
|                             | CH <sub>3</sub> | 2.058                    | 25.01                       |
| $\beta$ -GlcNH <sub>2</sub> | 1               | 4.542                    | -                           |
|                             | 2               | 2.775                    | 58.86                       |
|                             | 3               | 3.495                    | 72.71                       |
|                             | 4               | 3.387                    | 77.00                       |
|                             | 5               | 3.589                    | 72.31                       |
|                             | 6               | 4.168                    | 71.21                       |
|                             | 6'              | 3.710                    | 71.21                       |
|                             |                 |                          |                             |

**Table S.3.** The  $^1\text{H}$  and  $^{13}\text{C}$  chemical shifts of each PNAG constituent. (-) denotes  $^{13}\text{C}$  chemical shift cannot be elucidated as falls within the solvent suppression area of HSQC spectra.

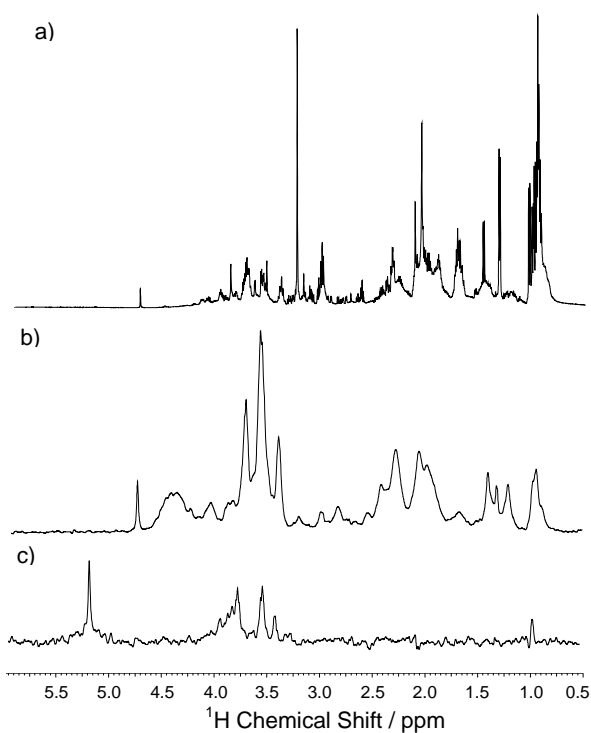

**Figure S.2.** a) A 1D  $^1\text{H}$  spectrum, b) XS-TOCSY excitation at 4.5ppm and c) XS-TOCSY excitation at 5.2ppm of a crude, de-proteinated biofilm extract of the *S. epidermidis* strain RP62A in  $\text{D}_2\text{O}$ . Excitation at 4.5ppm gave  $^1\text{H}$  resonances of note at 4.76, 3.71, 3.55 and 3.40ppm. Excitation at 5.2ppm gave  $^1\text{H}$  resonances at 5.18, 3.98, 3.76, 3.53, 3.41ppm.

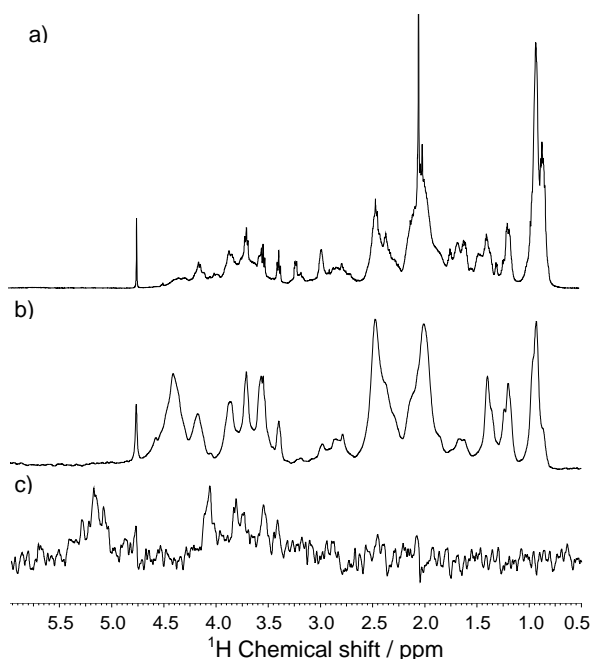

**Figure S.3. a) A 1D  $^1H$  spectrum, b) XS-TOCSY excitation at 4.5ppm and c) XS-TOCSY excitation at 5.2ppm of a crude, de-proteinated biofilm extract of the *S. epidermidis* strain 444 in  $D_2O$ .** Excitation at 4.5ppm gave  $^1H$  resonances of 4.76, 3.71, 3.55 and 3.40ppm. Excitation at 5.2ppm gave  $^1H$  resonances of note at 5.28, 5.18, 4.06, 3.53, and 3.41ppm.

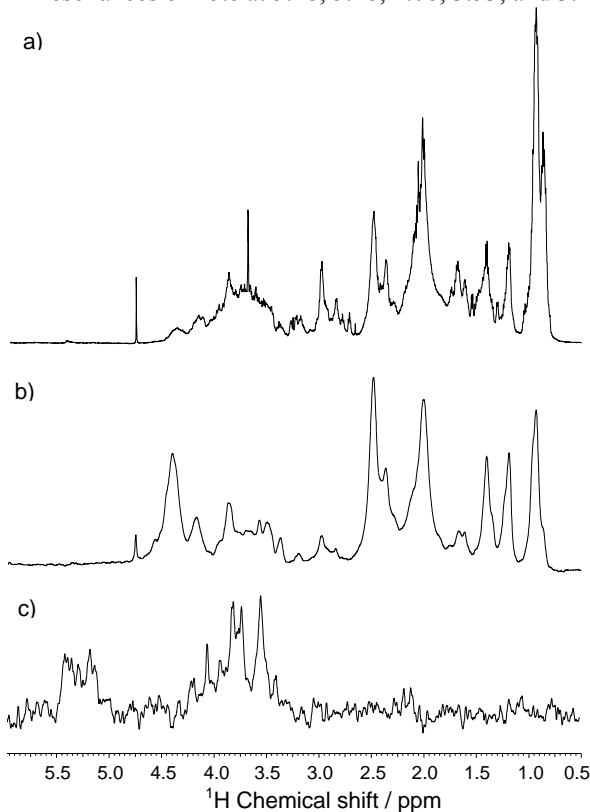

**Figure S.4. a) A 1D  $^1H$  spectrum, b) XS-TOCSY excitation at 4.5ppm and c) XS-TOCSY excitation at 5.2ppm of a crude, de-proteinated biofilm extract of the *S. epidermidis* strain 341 in  $D_2O$ .** Excitation at 4.5ppm gave  $^1H$  resonances of 4.76, 3.71, 3.55 3.40 and 1.61ppm. Excitation at 5.2ppm gave  $^1H$  resonances of note at 5.18, 4.06, 3.98, 3.76, 3.53 and 3.41ppm.

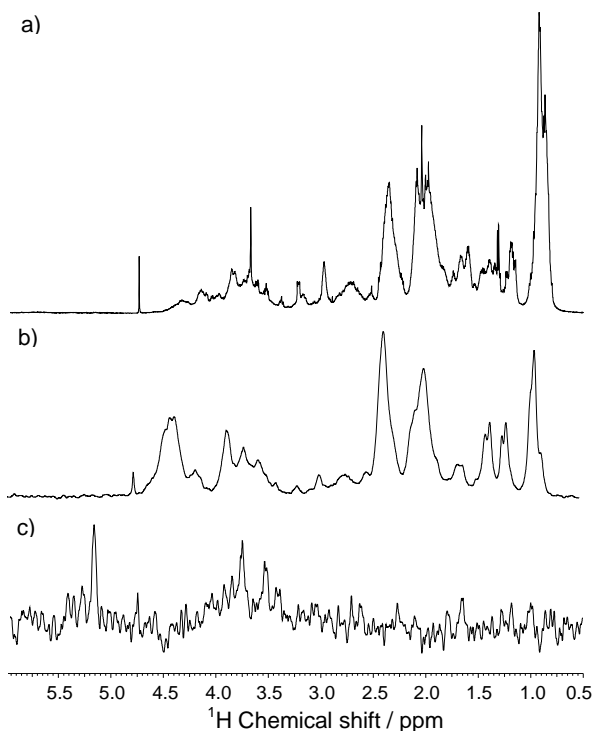

**Figure S.5. a) A 1D  $^1\text{H}$  spectrum, b) XS-TOCSY excitation at 4.5ppm and c) XS-TOCSY excitation at 5.2ppm crude (not de-proteinated) biofilm extract of the *S. epidermidis* strain 444 in  $\text{D}_2\text{O}$ . Excitation at 4.5ppm gave  $^1\text{H}$  resonances of 4.76, 3.71, 3.55 and 3.40ppm. Excitation at 5.2ppm gave  $^1\text{H}$  resonances of note at 5.18, 4.06, 3.98, 3.76, 3.58 and 3.41ppm.**
